# Supplementary material
Source: PubMed Central journal article supplement (PMC8444950)
Supplement: mmc1.pdf [file mmc1.pdf]

# Supplementary Material to “Trust in the government increases financial well-being and overall well-being during COVID-19”

Kinga Barrafrem<sup>1</sup>, Gustav Tinghög<sup>2</sup>, Daniel Västfjäll<sup>3</sup>

## Used scales

**Table S1** Measures of financial well-being. Each of the scales is the average of answers to each of the items.

| Subscale           | Item                                                                                                                                                                                                                                                                                                                 |
|--------------------|----------------------------------------------------------------------------------------------------------------------------------------------------------------------------------------------------------------------------------------------------------------------------------------------------------------------|
| Financial Anxiety  | <ol style="list-style-type: none"> <li>1. I get unsure by the lingo of financial experts</li> <li>2. I am anxious about financial and money affairs</li> <li>3. I tend to postpone financial decisions as long as possible</li> <li>4. After making a decision, I am anxious whether I was right or wrong</li> </ol> |
| Financial Security | <ol style="list-style-type: none"> <li>1. I feel secure in my current financial situation</li> <li>2. I feel confident about my financial future</li> <li>3. I feel confident about having enough money to support myself in retirement, no matter how long I live</li> </ol>                                        |

**Table S2** Measures of general well-being. Each of the scales is the average of answers to each of the items.

| Subscale               | Item                                                                                                                                                                                                                                                                                                                                                                                                                                                                                                                                                                                                                                                                                                                 |
|------------------------|----------------------------------------------------------------------------------------------------------------------------------------------------------------------------------------------------------------------------------------------------------------------------------------------------------------------------------------------------------------------------------------------------------------------------------------------------------------------------------------------------------------------------------------------------------------------------------------------------------------------------------------------------------------------------------------------------------------------|
| Satisfaction with Life | <ol style="list-style-type: none"> <li>1. In most ways my life is close to my ideal.</li> <li>2. I am satisfied with my life.</li> <li>3. So far I have gotten the important things I want in life.</li> <li>4. If I could live my life over, I would change almost nothing</li> <li>5. The conditions of my life are excellent.</li> </ol>                                                                                                                                                                                                                                                                                                                                                                          |
| Subjective Happiness   | <ol style="list-style-type: none"> <li>1. In general, I consider myself:<br/>not a very happy person (1) – a very happy person (7)</li> <li>2. Compared with most of my peers, I consider myself:<br/>less happy (1) – more happy (7)</li> <li>3. Some people are generally very happy. They enjoy life regardless of what is going on, getting the most out of everything. To what extent does this characterization describe you?<br/>Not at all (1) – a great deal (7)</li> <li>4. Some people are generally not very happy. Although they are not depressed, they never seem as happy as they might be. To what extent does this characterization describe you?<br/>Not at all (1) – a great deal (7)</li> </ol> |

<sup>1</sup> Corresponding author. JEDI Lab, Division of Economics, Department of Management and Engineering, Linköping University, 581 83 Linköping, Sweden, kinga.barrafrem@liu.se

<sup>2</sup> JEDI Lab, Division of Economics, Department of Management and Engineering, Linköping University; The National Center for Priority Setting in Health Care, Department of Medical and Health Sciences, Linköping University, Linköping, Sweden

<sup>3</sup> JEDI Lab, Division of Psychology, Department of Behavioral Sciences and Learning, Linköping University, Linköping, Sweden; Decision Research, Eugene, OR, USA

**Table S3** Measures related to COVID-19.

| Variable                     | Item                                                                                                                                           |
|------------------------------|------------------------------------------------------------------------------------------------------------------------------------------------|
| Trust in government: finance | How much trust do you have in the state authorities to handle the economic challenges that Sweden faces?                                       |
| Trust in government: health  | How much trust do you have in the state authorities to handle the healthcare challenges that Sweden faces?                                     |
| Financial risk               | How much risk do you think the ongoing COVID-19 pandemic poses to your financial situation?                                                    |
| Health risk                  | How much risk do you think the ongoing COVID-19 pandemic poses to your health?                                                                 |
| Income change                | Did your income decrease as a result of the COVID-19 pandemic?<br>No / Yes, a smaller part of my income / Yes, a significant part of my income |

**Table S4** The measure of financial literacy. Financial literacy is a sum of correct answers to these questions.

| Item                                                                                                                                                                                                                                                                                                                          |
|-------------------------------------------------------------------------------------------------------------------------------------------------------------------------------------------------------------------------------------------------------------------------------------------------------------------------------|
| <p>1. Suppose you had £100 in a savings account and the interest rate was 2% per year. After 5 years, how much do you think you would have in the account if you left the money to grow?</p> <p>More than £102 / Exactly £102 / Less than £102 / Don't know</p>                                                               |
| <p>2. Imagine that the interest rate on your savings account was 1% per year and inflation was 2% per year. After 1 year, with the money in this account, would you be able to buy...</p> <p>More than today / Exactly the same as today / Less than today / Don't know</p>                                                   |
| <p>3. Do you think the following statement is true or false? "Buying a single company stock usually provides a safer return than a stock mutual fund."</p> <p>True / False / Don't know</p>                                                                                                                                   |
| <p>4. Bonds are securities that are issued with a fixed interest rate for a certain period of time. If interest rates fall, what will typically happen to bond prices?</p> <p>They will rise / They will fall / They will stay the same / There is no relationship between bond prices and the interest rate / Don't know</p> |
| <p>5. 5. A 15-year mortgage typically requires higher monthly payments than a 30-year mortgage, but the total interest paid over the life of the loan will be less.</p> <p>True / False / Don't know</p>                                                                                                                      |

**Table S5** Socioeconomic variables.

| Variable         | Item                                                                                                                                                                                                |
|------------------|-----------------------------------------------------------------------------------------------------------------------------------------------------------------------------------------------------|
| Female           | Are you a man nor a woman?<br>- Man<br>- Woman                                                                                                                                                      |
| Age              | How old are you?                                                                                                                                                                                    |
| Education        | What is your highest completed education?<br>- Primary education<br>- Secondary education<br>- Higher education, less than 3 years<br>- Higher education, 3 years or more                           |
| Household income | What is your household's approximate total monthly income before tax?<br>- Less than 15 000<br>- 15 000 – 24 999<br>- 25 000 – 34 999<br>- 35 000 – 44 999<br>- 45 000 – 54 999<br>- 55 000 or more |

**Table S6** The relationship between trust in government and general well-being. Linear regression models

| VARIABLES                  | Satisfaction with Life | Satisfaction with Life | Subjective Happiness | Subjective Happiness |
|----------------------------|------------------------|------------------------|----------------------|----------------------|
| Trust in gov.: finance     | 0.070**<br>(0.028)     | 0.042<br>(0.027)       | 0.077**<br>(0.037)   | 0.050<br>(0.037)     |
| Trust in gov.: healthcare  | 0.081***<br>(0.029)    | 0.065**<br>(0.027)     | 0.114***<br>(0.037)  | 0.096***<br>(0.036)  |
| Financial risk             |                        | -0.074***<br>(0.018)   |                      | -0.091***<br>(0.023) |
| Health risk                |                        | -0.035*<br>(0.020)     |                      | -0.025<br>(0.027)    |
| Financial literacy         |                        | 0.041*<br>(0.025)      |                      | 0.049<br>(0.030)     |
| Household income           |                        | 0.161***<br>(0.018)    |                      | 0.138***<br>(0.023)  |
| Female                     |                        | -0.044<br>(0.060)      |                      | 0.011<br>(0.075)     |
| Age                        |                        | 0.009***<br>(0.002)    |                      | 0.013***<br>(0.002)  |
| Educ.: Secondary           |                        | 0.280**<br>(0.119)     |                      | 0.185<br>(0.164)     |
| Educ.: University <3 years |                        | 0.413***<br>(0.128)    |                      | 0.371**<br>(0.175)   |
| Educ.: University ≥3 years |                        | 0.299**<br>(0.126)     |                      | 0.241<br>(0.171)     |
| Constant                   | 2.335***<br>(0.083)    | 1.536***<br>(0.191)    | 3.575***<br>(0.110)  | 2.689***<br>(0.251)  |
| Observations               | 1,021                  | 1,021                  | 1,021                | 1,021                |
| R-squared                  | 0.067                  | 0.213                  | 0.070                | 0.169                |

**Note:** Robust standard errors (MacKinnon & White, 1985) in parentheses. \*\*\* p<0.01, \*\* p<0.05, \* p<0.1. Outcome variables are listed on the top of each column. Satisfaction with life takes values between 1 (low satisfaction) and 5 (high satisfaction). Subjective happiness takes values between 1 (low happiness) and 7 (high happiness). Trust in government variables take value between 1 (low trust) and 7 (high trust) and indicate trust in governmental institutions to cope with financial/health challenges of COVID-19 pandemic; Financial risk and health risk take value between 1 (low perceived risk) and 7 (high perceived risk) and indicate perceived risk that COVID-19 pandemic has on one's own financial situation and health status; Financial literacy takes values between 0 (low fin. literacy) and 5 (high fin. literacy). Household income is an ordinal variable and represents monthly gross income of a household where the lowest category is "less than 15 000 SEK" and the highest category is "55 000 SEK or more"; Reference category for Female is male and for Education is primary education.

**Table S7** The relationship between trust in government and financial well-being. Linear regression models with standardized beta coefficients.

| VARIABLES                  | (1)<br>Financial<br>security | (2)<br>Financial<br>security | (3)<br>Financial<br>anxiety | (4)<br>Financial<br>anxiety |
|----------------------------|------------------------------|------------------------------|-----------------------------|-----------------------------|
| Trust in gov.: finance     | 0.242***                     | 0.172***                     | -0.068                      | -0.017                      |
| Trust in gov.: healthcare  | 0.006                        | -0.029                       | -0.024                      | 0.007                       |
| Financial risk             |                              | -0.197***                    |                             | 0.210***                    |
| Health risk                |                              | -0.100***                    |                             | 0.118***                    |
| Financial literacy         |                              | 0.129***                     |                             | -0.119***                   |
| Household income           |                              | 0.263***                     |                             | -0.116***                   |
| Female                     |                              | -0.134***                    |                             | 0.049                       |
| Age                        |                              | 0.099***                     |                             | -0.175***                   |
| Educ.: Secondary           |                              | 0.089                        |                             | -0.158***                   |
| Educ.: University <3 years |                              | 0.091*                       |                             | -0.179***                   |
| Educ.: University ≥3 years |                              | 0.145**                      |                             | -0.158***                   |
| Observations               | 1,021                        | 1,021                        | 1,021                       | 1,021                       |
| R-squared                  | 0.061                        | 0.294                        | 0.008                       | 0.165                       |

**Note:** Standardized beta coefficients are listed \*\*\* p<0.01, \*\* p<0.05, \* p<0.1. Outcome variables are listed on the top of each column. Financial anxiety takes values between 1 (low level of anxiety) and 5 (high level of anxiety). Financial security takes values between 1 (low level of security) and 5 (high level of security). Trust in government variables take value between 1 (low trust) and 7 (high trust) and indicate trust in governmental institutions to cope with financial/health challenges of COVID-19 pandemic; Financial risk and health risk take value between 1 (low perceived risk) and 7 (high perceived risk) and indicate perceived risk that COVID-19 pandemic has on one's own financial situation and health status; Financial literacy takes values between 0 (low fin. literacy) and 5 (high fin. literacy). Household income is an ordinal variable and represents monthly gross income of a household where the lowest category is "less than 15 000 SEK" and the highest category is "55 000 SEK or more"; Reference category for Female is male and for Education is primary education.

**Table S8** Direct and indirect effects on Satisfaction with Life in SEM analysis

| Variable                  | Direct effect | Indirect effect | Total effect |
|---------------------------|---------------|-----------------|--------------|
| Trust in gov.: finance    | 0.001         | 0.069***        | 0.070**      |
| Trust in gov.: healthcare | 0.078***      | 0.003           | 0.081***     |
| Financial security        | 0.388***      |                 | 0.388***     |
| Financial anxiety         | -0.140***     |                 | -0.140***    |

**Note:** \*\*\* p<0.01, \*\* p<0.05, \* p<0.1. Indirect effect for Trust in gov.: finance =  $0.164 \cdot 0.388 + (-0.035) \cdot (-0.140) = 0.069$ . Indirect effect for Trust in gov.: healthcare =  $0.004 \cdot 0.388 + (-0.012) \cdot (-0.140) = 0.003$ .

**Table S9** Direct and indirect effects on Subjective Happiness in SEM analysis

| Variable                  | Direct effect | Indirect effect | Total effect |
|---------------------------|---------------|-----------------|--------------|
| Trust in gov.: finance    | 0.008         | 0.069***        | 0.077**      |
| Trust in gov.: healthcare | 0.110***      | 0.005           | 0.114***     |
| Financial security        | 0.363***      |                 | 0.363***     |
| Financial anxiety         | -0.265***     |                 | -0.265***    |

**Note:** \*\*\* p<0.01, \*\* p<0.05, \* p<0.1. Indirect effect for Trust in gov.: finance =  $0.164 \cdot 0.363 + (-0.035) \cdot (-0.265) = 0.069$ . Indirect effect for Trust in gov.: healthcare =  $0.004 \cdot 0.363 + (-0.012) \cdot (-0.265) = 0.005$ .
